# Supplementary material for: A Multifactorial Regulation of Glutathione Metabolism behind Salt Tolerance in Rice
Source: MDPI journal article supplement (doi:10.3390/antiox11061114), 2022-06-03
Supplement: s1 [file s1]

## Supplementary Data

**Table S1.** Primer sequences for Real Time analyses.

| Gene Name                                    | Locus ID                              | Primer Name      | Primer Sequence                                        |
|----------------------------------------------|---------------------------------------|------------------|--------------------------------------------------------|
| <b>Ubiquitin</b>                             | Os01g0328400                          | OsUBQ5-FW        | TTCTACAAGGTGGACGACGC                                   |
|                                              |                                       | OsUBQ5-Rev       | AGATCAGAGCAAAGCGAGCA                                   |
| <b>Actin</b>                                 | Os03g0718100                          | OsAct1-FW        | TGGCATCTCTCAGCACATTCC                                  |
|                                              |                                       | OsAct1-Rev       | TGCACAATGGATGGGCCAGA                                   |
| <b>PDCD5<br/>programmed<br/>cell death 5</b> | Os05g0547850                          | OsPDCD5-FW       | ATCCGCCCCTGTTGTATGTG                                   |
|                                              |                                       | OsPDCD5-Rev      | ATGAAGCAAGGAGCCAACCA                                   |
| <b>GS1</b>                                   | Os11g0642800                          | OsGS1-FW         | GTGGCGTTTGCTTTGAGGAC                                   |
|                                              |                                       | OsGS1-Rev        | GTTCTGAGCTTCCAAAGGGTT                                  |
| <b>yECS</b>                                  | Os05g0129000                          | OsECS-FW         | AGCCTTTGTAGGTGGTGTCTTTTA                               |
|                                              |                                       | OsECS-Rev        | AAGAGGGTCTGGTACAAACAGTG                                |
| <b>miRNA395f</b>                             | Chr4: 31804774-<br>31804855 MI0001043 | OsmiR395f-UPL-RT | GTTGGCTCTGGTGCAGGGTCCGAGGTATTCGCAC<br>CAGAGCCAACGAGTTC |
|                                              |                                       | OsmiR395f-FW     | GGCGGGTGAATTGTTTGGG                                    |
|                                              |                                       | Rev Universal    | GTGCAGGGTCCGAGGT                                       |

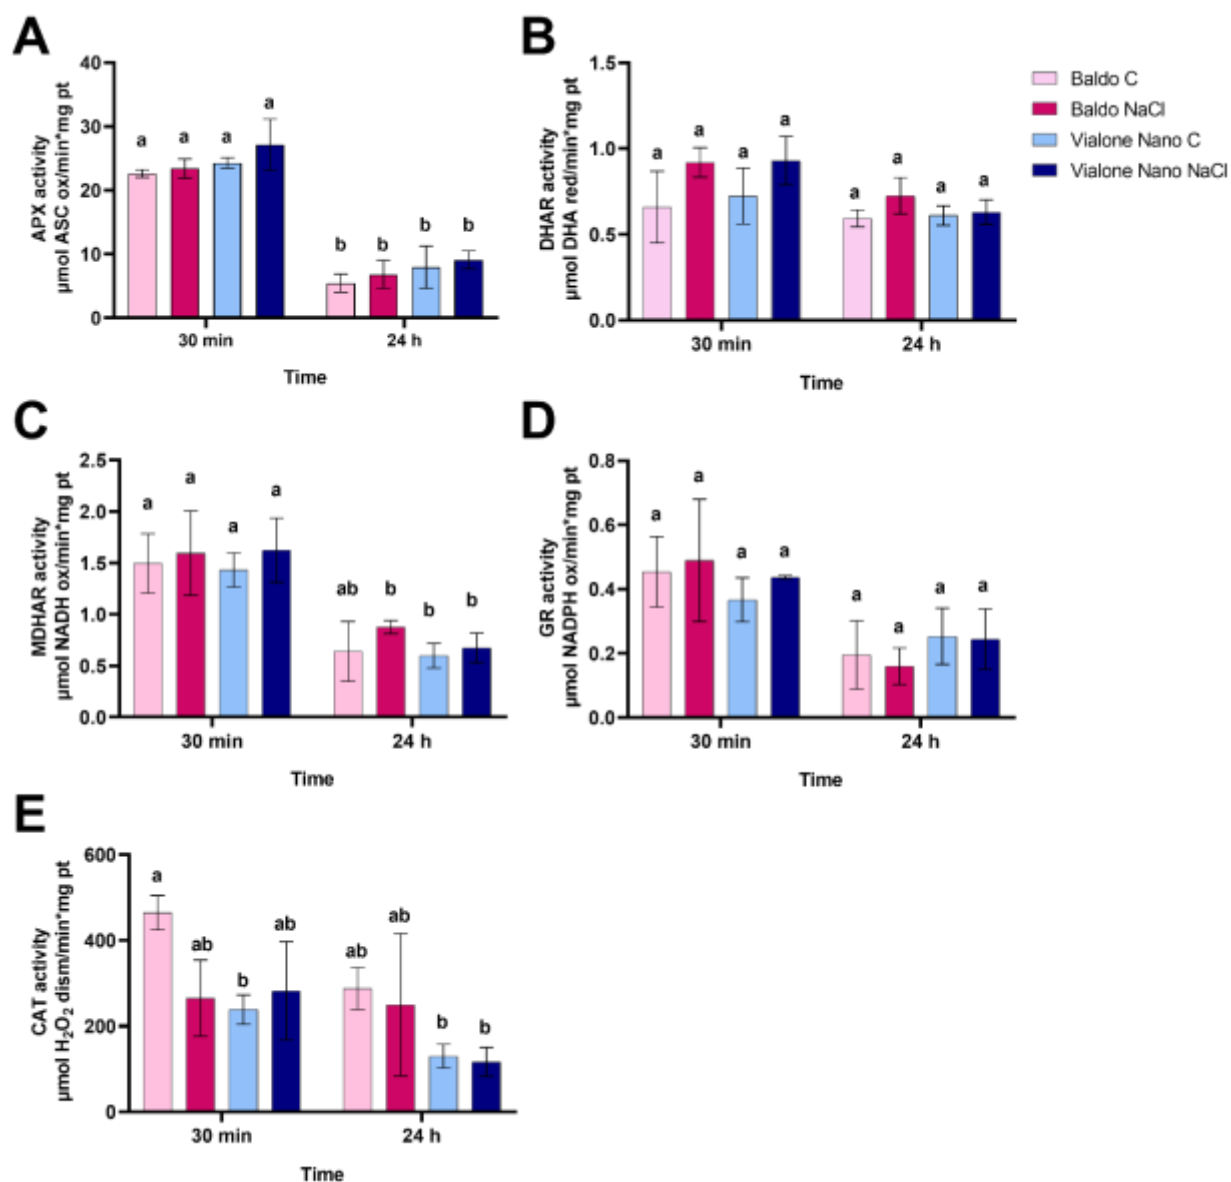

**Figure S1. Changes in the activity of redox-related enzymes.** Ascorbate peroxidase (APX); dehydroascorbate reductase (DHAR); monodehydroascorbate reductase (MDHAR); glutathione reductase (GR); catalase (CAT). The reported values are the means of four independent experiments  $\pm$  standard deviation. Statistical significance was determined by one-way ANOVA followed by a Tukey test ( $P < 0.05$ ). Different letters indicate significant difference.
